# Supplementary material for: The making of a genomic parasite - the Mothra family sheds light on the evolution of Helitrons in plants
Source: PubMed Central journal article supplement (PMC4683698; doi:10.1186/s13100-015-0054-4), 2015-12-17
Supplement: 13100_2015_54_MOESM1_ESM.pdf [file 13100_2015_54_MOESM1_ESM.pdf]

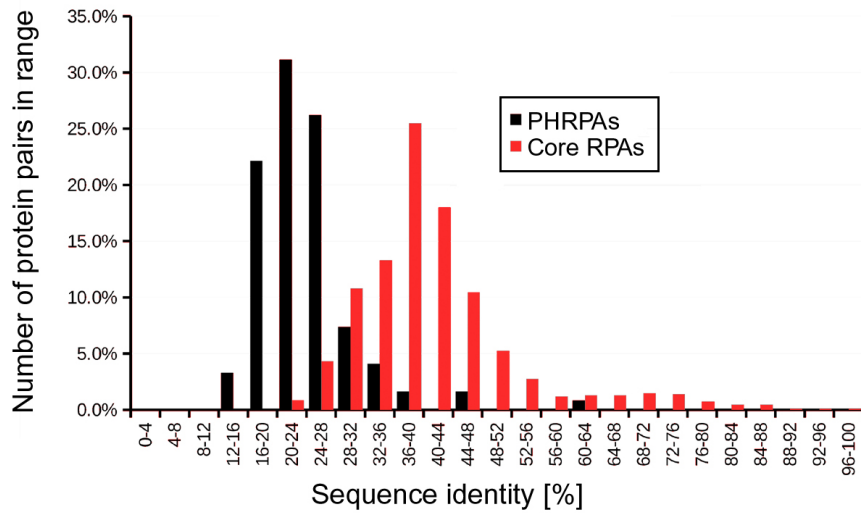

**Additional Figure 1.** Levels of sequence identity of RPA core and PHRPA proteins. For this analysis, all proteins within the two groups were compared pairwise. The x-axis shows the degree of sequence identity at the protein level while the y-axis shows the percentage of protein pairs in each class.
